# Supplementary material for: A Novel Automated Immunoassay Platform to Evaluate the Association of Adiponectin and Leptin Levels with Breast Cancer Risk
Source: MDPI journal article supplement (doi:10.3390/cancers13133303), 2021-06-30
Supplement: s1 [file s1]

**Supplemental Table S1.** Characteristics of breast cancers that occurred during follow-up

| Patient         | Disease status at baseline | Breast cancer type | Lymph-node involvement | Breast cancer grade | ER* status | PR* status | HER* status |
|-----------------|----------------------------|--------------------|------------------------|---------------------|------------|------------|-------------|
| 1               | HEALTHY*                   | DCIS               | NO                     | 2                   | positive   | positive   | negative    |
| 2               | HEALTHY                    | DCIS               | NO                     | 2                   | unknown    | unknown    | unknown     |
| 3               | HEALTHY                    | DCIS               | NO                     | 2                   | unknown    | unknown    | unknown     |
| 4               | HEALTHY                    | INVASIVE           | NO                     | 2                   | positive   | positive   | negative    |
| 5               | HEALTHY                    | INVASIVE           | NO                     | 3                   | negative   | negative   | positive    |
| 6               | HEALTHY                    | INVASIVE           | NO                     | 2                   | positive   | positive   | negative    |
| 7               | HEALTHY                    | INVASIVE           | NO                     | 2                   | positive   | positive   | negative    |
| 8               | HEALTHY                    | INVASIVE           | NO                     | 2                   | positive   | negative   | negative    |
| 9               | HEALTHY                    | INVASIVE           | NO                     | 3                   | positive   | positive   | unknown     |
| 10              | HEALTHY                    | INVASIVE           | NO                     | 3                   | negative   | negative   | unknown     |
| 11              | HEALTHY                    | INVASIVE           | NO                     | 1                   | positive   | positive   | unknown     |
| 12              | HEALTHY                    | INVASIVE           | NO                     | 2                   | positive   | positive   | negative    |
| 13              | HEALTHY                    | INVASIVE           | YES                    | 2                   | positive   | positive   | negative    |
| 14              | HEALTHY                    | INVASIVE           | YES                    | 2                   | positive   | positive   | negative    |
| 15              | DCIS*                      | DCIS               | NO                     | 2                   | unknown    | unknown    | unknown     |
| 16              | DCIS                       | DCIS               | unknown                | 2                   | negative   | negative   | positive    |
| 17              | DCIS                       | INVASIVE           | NO                     | 2                   | positive   | positive   | unknown     |
| 18              | DCIS                       | INVASIVE           | NO                     | 3                   | negative   | negative   | positive    |
| 19              | DCIS                       | INVASIVE           | NO                     | 2                   | positive   | negative   | unknown     |
| 20 <sup>1</sup> | DCIS                       | INVASIVE           | NO                     | 2                   | positive   | positive   | unknown     |
| 21 <sup>2</sup> | DCIS                       | INVASIVE           | unknown                | 2                   | positive   | positive   | negative    |

\*ER, estrogen receptor; PR, progesteron receptor; HER, human epidermal growth factor receptor 2; HEALTHY: Subjects randomized in the Prevention IBIS-II Trial; DCIS, Ductal Carcinoma In Situ: Subjects randomized in the DCIS IBIS-II Trial

<sup>1</sup>Only leptin measurement available

<sup>2</sup>Only adiponectin measurement available

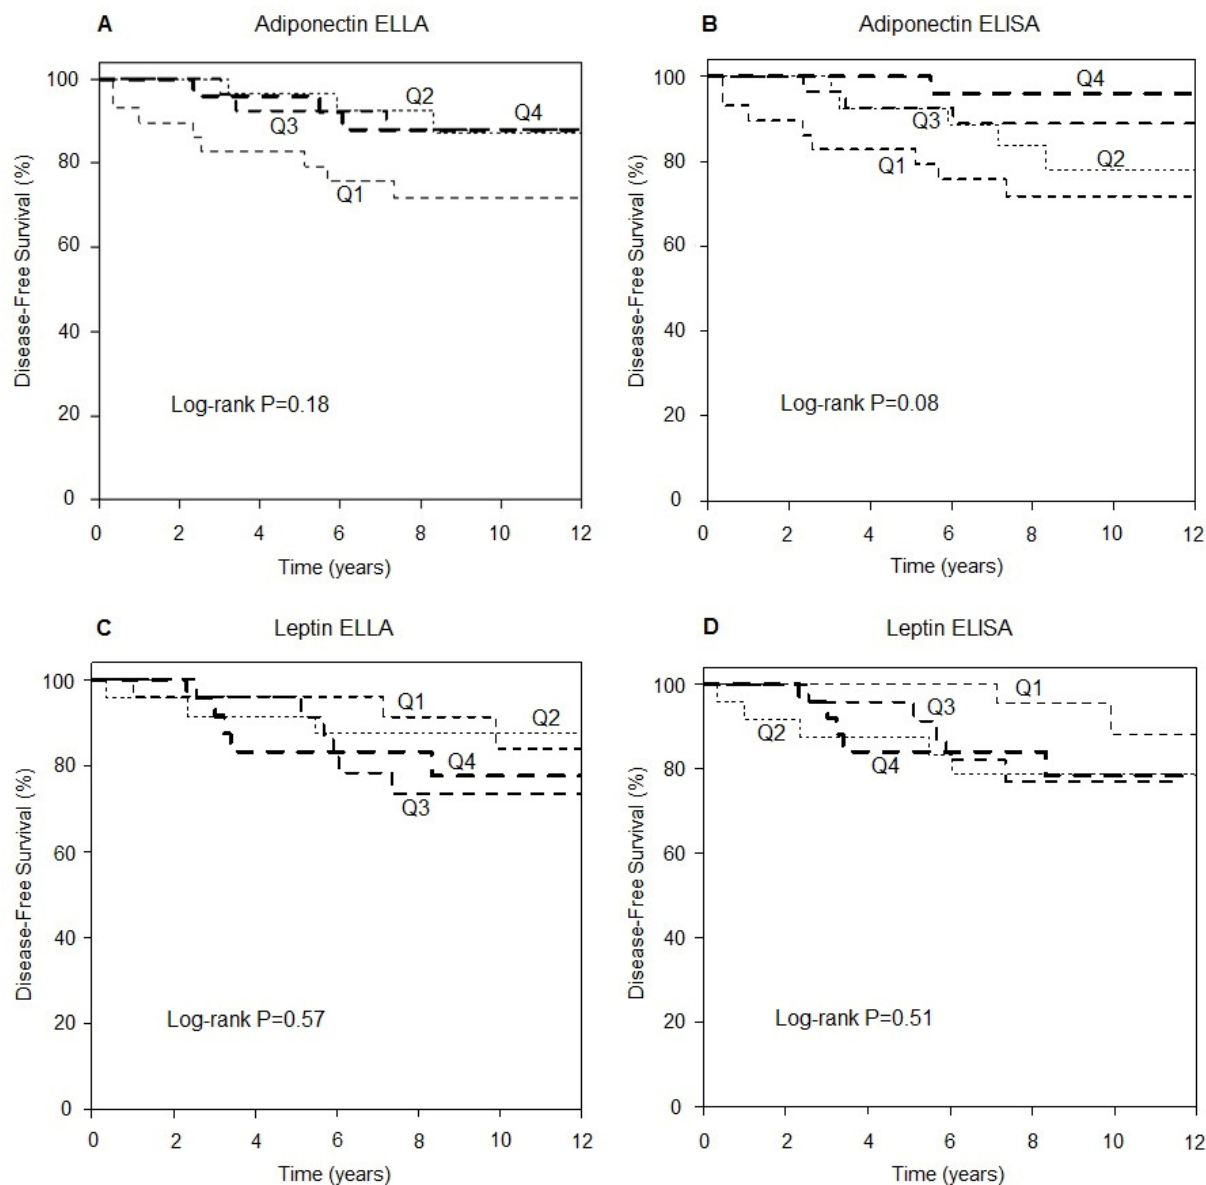

**Supplemental Figure 1.** Disease-free survival curves for different quartiles (Q1-4) of adiponectin measured with ELLA (A) or ELISA (B) and leptin measured with ELLA (C) or ELISA (D). Disease-free survival was calculated including subjects with resected DCIS and high risk healthy subjects.
